1 **Title**

2 **Consent to Recontact for Future Research Using Linked Primary Healthcare Data: Outcomes**  
3 **and General Practice Perceptions from the ATHENA COVID-19 Study.**

4

5 **Short title**

6 Consent to recontact for clinical trials.

7

8 **Total number of words:** 3974

9

10 **Authors**

11 Kim Greaves, 1, 2; kim.greaves@health.qld.gov.au

12 Amanda King, 1; amanda.king@health.qld.gov.au

13 Zoltan Bourne, 4; zoltan\_bourne@hotmail.com

14 Jennifer Welsh, 2; jennifer.welsh@anu.edu.au

15 Mark Morgan, 7; mmorgan@bond.edu.au

16 M. Ximena Tolosa, 6; ximena.tolosa@health.qld.gov.au

17 Trisha Johnston, 3; trisha.johnston@health.qld.gov.au

18 Carissa Bonner, 5; carissa.bonner@sydney.edu.au

19 Tony Stanton, 1; tony.stanton@health.qld.gov.au

20 Rosemary Korda, 2; rosemary.korda@anu.edu.au

21

22 1. Sunshine Coast University Hospital, Queensland Health, 6 Doherty Street, Birtinya, QLD, 4575,  
23 Australia.

24 2. National Centre for Epidemiology and Population Health, ANU College of Health and Medicine,  
25 Australian National University, Canberra, ACT 2600, Australia.

26 3. Queensland Health, Statistical Services Branch, 33 Charlotte Street, Brisbane, QLD 4001,  
27 Australia.

28 4. Hinterland Health, Maple Street, Maleny, QLD 4551, Australia.

29 5. School of Public Health, Sydney Medical School, University of Sydney, NSW 2006, Australia.

30 Email:

1 6. Queensland Department of Health, Communicable Disease Branch, 15 Butterfield St, Herston,  
2 QLD 4001, Australia.

3 7. Faculty of Health Sciences and Medicine, Bond University, Gold Coast, QLD 4229, Australia.

4 **Corresponding Author**

5 Kim Greaves

6 kim.greaves@health.qld.gov.au

7

8

9 **Trial registration details:** not applicable

10

11 **Keywords**

12 General practice; primary care; consent; recontact; data linkage; sharing; attitudes; clinical trial;

13 ATHENA; COVID-19.

14

15 **List of Abbreviations**

16 ACV19: ATHENA COVID-19

17 ATHENA: Australians Together Health Initiative

18 COVID-19: Coronavirus disease 2019

19 GP: General practice

1 **Abstract**

2 **Background:** The ATHENA COVID-19 (ACV19) study was set up to recruit a cohort of patients with  
3 linked health information willing to be re-contacted in future to participate in clinical trials, and also to  
4 investigate the outcomes of people with COVID-19 in Queensland, Australia, using consent. This  
5 report describes how patients were recruited, their primary care data extracted, proportions  
6 consenting, outcomes of using the recontact method to recruit to a study, and experiences interacting  
7 with general practices requested to release the primary care data.

8 **Methods:** Patients diagnosed with COVID-19 from January 1<sup>st</sup>, 2020, to December 31<sup>st</sup>, 2020, were  
9 systematically approached to gain consent to have their primary healthcare data extracted from their  
10 general practice into a Queensland Health database and linked to other datasets for ethically  
11 approved research. Patients were also asked to consent to allow future recontact to discuss  
12 participation in clinical trials and other research studies. Patients who consented to recontact were  
13 later approached to recruit to a long-COVID study. Patients' general practices were contacted to  
14 export the patient files. All patient and general practice interactions were recorded. Outcome  
15 measures were proportions of patients consenting to data extraction and research, permission to  
16 recontact, proportions of general practices agreeing to participate. A thematic analysis was conducted  
17 to assess attitudes regarding export of healthcare data, and the proportions consenting to participate  
18 in the long-COVID study also reported.

19 **Results:** Out of 1212 patients with COVID-19, contact details were available for 1155; 995(86%) were  
20 successfully approached, and 842(85%) reached a consent decision. Of those who reached a  
21 decision, 581(69%), 615(73%) and 629(75%) patients consented to data extraction, recontact, and  
22 both, respectively. 382 general practices were contacted, of whom 347(91%) had an electronic  
23 medical record compatible for file export. Of these, 335(88%) practices agreed to participate, and  
24 12(3%) declined. In total 526 patient files were exported. The majority of general practices supported  
25 the study and accepted electronic patient consent as legitimate. For the long COVID study, 376(90%)  
26 of those patients recontacted agreed to have their contact details passed onto the long COVID study  
27 team and 192(53%) consented to take part in their study.

28 **Conclusions:** This report describes how primary care data was successfully extracted using consent,  
29 and that the majority of patients approached gave permission for their healthcare information to be  
30 used for research and be recontacted. The consent-to-recontact concept demonstrated its

1 effectiveness to recruit to new research studies. The majority of general practices were willing to  
2 export identifiable patient healthcare data for linkage provided consent had been obtained.

3

#### 4 **Background**

5 Timely recruitment of suitable patients in sufficient numbers to clinical trials remains a major challenge  
6 to the research industry and the same applies to COVID-19 related research.<sup>1</sup> Consent to recontact is  
7 a strategy whereby people give generic consent to be recontacted about new research opportunities.<sup>2</sup>  
8 <sup>3</sup> The availability of a registry of patients with linked health care information that can be screened to  
9 find specific patients for trials who have also pre-consented to be contacted to discuss participation in  
10 new research opportunities, would greatly accelerate clinical trial timelines and translation to  
11 outcomes.

12 The effective use of patient healthcare information in countries by linking primary care, hospital, and  
13 other health registry data to improve healthcare delivery is a global goal.<sup>4</sup> Primary care data is  
14 particularly valuable as it contains detailed health information that is available at scale, with an  
15 estimated 80% of Australians visiting a general practitioner at least once each year.<sup>5</sup> These linked  
16 data can be used for population health research, development of cohort studies and, if consent has  
17 been obtained, provide a large pool of participants that can be readily screened and then recontacted  
18 for recruitment to clinical trials.<sup>6-9</sup> However, Australia has lagged behind other high-income nations in  
19 linking primary care data to other regional and national sources.<sup>10</sup> Reasons for this include general  
20 practice clinics working as private companies, heterogeneous software platforms that lack  
21 interoperability, limited incentives and concerns about sharing patient data.<sup>11-15</sup> General practitioners  
22 are the custodians of primary care data in Australia and therefore it is essential to understand their  
23 attitudes towards sharing the data.<sup>16</sup> Although a modest amount has been published regarding  
24 attitudes of general practitioners towards data sharing, little is known about their beliefs in Australia.<sup>14,</sup>

25 <sup>15, 17-21</sup>

26 The ATHENA COVID-19 (ACV19) study was set up to recruit a cohort of patients with linked health  
27 information willing to be re-contacted in future to participate in clinical trials. It was also designed to  
28 enable ongoing investigation of health outcomes for people diagnosed with COVID-19 in Queensland,  
29 Australia, through the consent-based linkage of primary healthcare data with other datasets.<sup>22</sup> The  
30 study was also designed to inform future implementation of the ATHENA program, a consent-based,

1 state-wide, systematic mass recruitment of patients and linkage of healthcare data for the purposes of  
2 research and accelerated recruitment to clinical trials. This report describes how the study was set  
3 up, recruitment methods, and proportions consenting to primary care data linkage, and future  
4 recontact. The study also reports on the effectiveness of using the consent-to-recontact method to  
5 recruit to a new research study, and experiences interacting with general practices. The aim is to  
6 provide insights for those intending to use consent to extract, link and use primary healthcare data for  
7 research, and employ the recontact method to recruit to clinical trials.

8

## 9 **Methods**

### 10 **Setting**

11 The ATHENA program (Australians Together Health Initiative) is a Queensland Health funded  
12 concept involving the integration of primary, secondary and other healthcare datasets across  
13 Queensland. The vision is to deliver a state-wide registry containing the healthcare information and  
14 biospecimens of several million Australians across Queensland using dynamic consent to connect  
15 patients, researchers and the clinical trials industry.

16 As part of this, the ACV19 study was set up in 2020 in response to the COVID-19 pandemic to create  
17 a cohort of all people diagnosed with COVID-19 in Queensland with linked primary, secondary and  
18 registry data. There were two parts to the study. Part 1 (completed) linked Queensland COVID-19  
19 hospital and administrative data including notifiable conditions and deaths, did not require informed  
20 consent and is described in detail elsewhere.<sup>22</sup> Part 2 (described here) links data from the Part 1  
21 study to patients' healthcare information held within general practices and requires patient consent.  
22 All patients who had COVID-19 in Queensland in the period January 1<sup>st</sup>, 2020, up until December  
23 31<sup>st</sup>, 2020, were contacted to gain consent to have their primary healthcare data extracted from their  
24 general practice into a Queensland Health database and linked to other datasets for ethically  
25 approved COVID-19 research. Patients were also asked to consent to be re-contacted about possible  
26 participation in future COVID-19 related studies.

27 In Australia, the vast majority of general practices use an electronic medical records system to keep  
28 coded records of patients.<sup>23</sup> Multiple vendors exist of which Best Practice and Medical Director are the  
29 two most commonly used and have 90-95% of market share.<sup>24</sup> The ACV19 study engaged with these  
30 two systems specifically because of their innate capacity to export data in XML format. Conversely,

1 systems lacking this functionality, as well as practices unable to export data in XML format, were not  
2 eligible for inclusion in the study.'

3

#### 4 **Patient recruitment**

5 Patients identified as having had COVID-19 from the Queensland Health's Notifiable Conditions  
6 System were telephoned by the ACV19 team to ask permission to email or post an information pack  
7 about the study. After 2-5 days the patient was recontacted to answer any further questions and guide  
8 them through the patient information consent form. Patients then electronically signed the form  
9 (DocuSign) or manually signed-and-returned it by post. Patients nominated up to a maximum of three  
10 general practices with whom they were now or previously registered. In Australia, a person can be  
11 registered with multiple practices. Patients were informed that their consent was being verbally  
12 recorded.

13

#### 14 **General practice interaction**

15 Prior to patient recruitment, the study was advertised in Primary Health Network newsletters and a  
16 website created containing study information, with supporting letters from the RACGP, Chief Health  
17 Officer and all seven Primary Health Networks in Queensland.<sup>25</sup> An electronic clinical trials  
18 management system was used to manage and record all patient and general practice interactions.  
19 The liaison team consisted of a general practitioner (lead), two registered nurses, a Primary Health  
20 Network practice support officer and an allied health worker. An introductory call to the patient's  
21 general practice checked practice details and confirmed they had one of the two electronic record  
22 systems suitable for data transfer. After five days, a second call confirmed information receipt,  
23 answered questions and confirmed the patient was registered with the practice. Here, it was  
24 explained their patient had consented to participate which required export of the identifiable whole  
25 patient file to the Queensland Health. It was explained that no financial reimbursement for data  
26 release was available.

27

#### 28 **Data extraction from general practices**

29 An email was sent to the practice manager's inbox containing a single-use, secure file, transfer-  
30 hyperlink (Kiteworks) a standard method of file transfer used by Queensland Health and appended

1 with the general practitioner's provider number. No other patient or practitioner identifiers were  
2 contained in the message. A formal patient 'records request' letter and the patient's completed  
3 patient information and consent form were also sent via secure electronic messaging (Medical  
4 Objects) to the nominated inbox within the general practice electronic medical record system. This  
5 contained documents pre-tagged with the patient's name and date of birth to allow direct ingestion  
6 into the correct patient file within the system. Medical Objects is a widely used, secure method for  
7 information exchange between general practices and Queensland Health. A small minority of  
8 practices requested facsimile. The general practice exported the whole patient file to Queensland  
9 Health using Kiteworks. If no reply had been received within 5-7 days, the general practice was  
10 recontacted to guide them through the process. If the practice had any concerns, they were referred  
11 to the general practitioner lead who contacted the practice to resolve any issues. A small minority of  
12 practices requested facsimile. Contacting patients and general practices by the study team occurred  
13 between January 3<sup>rd</sup>, 2021 - August 27<sup>th</sup>, 2021. The ACV19 steering committee decided that once file  
14 transfer occurred and data was extracted, the file content would be deleted.

15

#### 16 **Data linkage with Queensland health data**

17 Primary healthcare data were linked probabilistically, using name, date of birth and address by the  
18 Statistical Services Branch, to Queensland COVID-19 hospital and administrative data including  
19 COVID-19 notifications and deaths from Part 1, applying established protocols.<sup>26</sup>

20

#### 21 **Data analyses**

22 General practice geographical area was classified using the Modified Monash Model which defines  
23 whether a location is a city, rural, remote or very remote (Modified Monash 1 is a major city, 7 very  
24 remote).<sup>27</sup> To identify recurring responses and themes from interactions with the general practices, a  
25 thematic analysis was conducted by the project lead (KG) using a standard phased approach as a  
26 guide.<sup>28</sup> Members of the general practice liaison team reviewed and familiarised themselves with the  
27 records of their general practice interactions and completed a questionnaire whereby they broadly  
28 listed practice types of responses. Based on these responses and known general practice attitudes to  
29 sharing data published in the literature, a list of categories was drawn up for focus group discussion  
30 by the project lead.<sup>14, 15</sup> The discussion involved the whole team, was audio recorded, and conducted

1 by the project lead, whereby each category and experience per team member was discussed in  
2 detail. The number of general practices who had responded in each category was recorded. The  
3 audio recording of the discussion was transcribed verbatim, and the transcripts reviewed over multiple  
4 inductive cycles from which broader general themes were developed.<sup>28</sup>

5

#### 6 **Using the consent to recontact to recruit to a research study.**

7 A research group from University of Queensland studying long-COVID wished to use the recontact  
8 process to recruit additional participants from the ATHENA COVID-19 cohort into their ethically  
9 approved study. The research group had used social media to advertise nationally and recruited 80  
10 patients. Details of their study can be found elsewhere.<sup>29</sup> After protocol approval by the ACV19  
11 steering committee, a proportion of the cohort who had consented to recontact were contacted and  
12 provided with an outline of the long-COVID study. Recontacted participants were asked if interested in  
13 hearing more about the study and, if so, gave consent to having their contact details passed onto the  
14 long COVID study team, who then contacted them to discuss the project in detail.

15

#### 16 **Patient and public involvement**

17 Between 2017-2019 a proof-of-concept study gauged the willingness of the public to link their  
18 healthcare data and received a positive response. One-on-one interviews were also undertaken with  
19 members of the public to understand the barriers and enablers to sharing and linking of primary  
20 healthcare data for research. The concept was also discussed with key stakeholders, including  
21 culturally and linguistically diverse community group leaders, and Australian and Torres Strait Islander  
22 representatives, to determine culturally sensitive approaches for recruitment of minority groups. This  
23 resulted in the Australian and Torres Strait Islander cohort recruitment being undertaken by a  
24 Queensland Health staff member identifying as Australian and Torres Strait Islander.

25

#### 26 **Ethics approval**

27 The ACV-19 study was granted ethics approval by the Gold Coast Human Research Ethics  
28 Committee 24<sup>th</sup> April 2020, # HREC/2020/QGC/63555.

29

#### 30 **Results**



1 1212 patients were registered in the Notifiable Conditions System as having had COVID-19 from Jan  
2 1<sup>st</sup>, 2020, to Dec 31<sup>st</sup>, 2020, in Queensland (Figure 1). Due to living interstate, 1155 participant  
3 contact details were listed to call, and 995(87%) were successfully contacted, of whom 842(85%)  
4 reached a consent decision. Of these, 581(69%) agreed to data extraction, 615(73%) to recontact,  
5 and 567(67%) to both (Table 1). Out of the 995 patients who were successfully contacted, 58%, 62%  
6 and 63% consented to data extraction, recontact, or both, respectively. The mean age of the cohort  
7 that reached a consent decision was 49.2 (95% range 21 - 77) years, and 50% were male. The mean  
8 age of those who consented was 50.6 (95% range 22 - 77) years and declined 46.1 (95% range 20 -  
9 77) years. Patients were registered to 382 practices, of whom 347(91%) had a compatible electronic  
10 record system. 335(91%) practices agreed to transfer their files, 12 declined, 331(88%) practices  
11 successfully exported their data, and 4 practices were unable to transfer their files. A total of 520 files  
12 (497 individual patients) were exported; 21 patients had  $\geq 2$  records from multiple practices. The  
13 majority of practices had a single registered patient, most were located in cities and larger towns  
14 (Table 2).

15

#### 16 **Consent to recontact to recruit to a research study.**

17 Of those patients who consented to recontact, 416 were contacted to discuss participation in the long-  
18 COVID study. Of these, 376(90%) consented to have their contact details passed onto the long-  
19 COVID team with 32(8%) declining, and 8(2%) were already enrolled. The long-COVID team  
20 approached 365 patients and 192(53%) consented to take part in their study.

21

#### 22 **Interactions with general practice representatives grouped by theme.**

23 Interactions with general practices were grouped into five themes: 1) support for study concept and  
24 sharing of health information for research; 2) patient consent to allow healthcare data release; 3) trust,  
25 legal and cybersecurity issues; 4) reimbursement, time constraints and technology issues; 5)  
26 corporate-owned general practice. Details of the interactions are provided in Table 3 and brief outline  
27 is provided here.

28

#### 29 **Theme 1. Support for study concept and sharing of health information for research.**

1 The majority response was “generally speaking, quite positive,” regarding “the idea of the study and  
2 contributing to the knowledge of COVID.” Twelve practices felt the study was not worthwhile. Ten  
3 thought they had to actively participate with concerns about lack of research experience and  
4 insurance cover. Four practices asked about ethics approval, and six about healthcare information  
5 storage (interstate or internationally) and all eventually took part. One practice wanted to know who  
6 had access to and could use the data.

7

## 8 **Theme 2. Patient consent for healthcare data release**

9 Fifteen practices were concerned we had approached the patient and gained consent without the  
10 practice knowing or being involved. The perception by the liaison team was that practices believed  
11 they should have had the opportunity to advise the patient before we spoke to them. All practices  
12 made the eventual decision to release the data but two required further discussion with our general  
13 practitioner lead. All practices wanted a copy of the signed consent form before patient file export.  
14 The vast majority were comfortable with accepting the electronic consent form and electronic  
15 signature as a legitimate form of consent. Several general practices that did not accept electronic  
16 consent phoned the patient to confirm that they had signed the consent form.

17

## 18 **Theme 3. Trust, legal issues, cybersecurity**

19 The majority of general practices had a high level of trust for Queensland Health to act as custodian  
20 of data and manage the research study. One team member stated: “I think it was a key factor that it  
21 was a government-led initiative.” Most practices at the start of the study had not heard of the ACV19  
22 project. Nineteen practices thought the team caller was a scam when first contacted. This was  
23 managed by directing the general practice staff to the Queensland Health ACV19 website. One  
24 practice sought independent legal counsel about participation in the study and then took part. Some  
25 practices (n=23) had concerns about exporting the whole patient file to the Queensland Health  
26 database as this included non-coded documents such as scanned letters and imaging reports. Once  
27 made clear that the whole file would be deleted once the coded information has been extracted, the  
28 practices were comfortable with exporting files. Nine practices contacted the patients and  
29 recommended against participating. When these patients were contacted as part of the study follow  
30 up protocol, six patients changed their mind and participated.

1

#### 2 **Theme 4. Reimbursement, time constraints and technology issues**

3 Nine practices initially requested payment ranging from \$80-\$150 to export the data, however eight  
4 practices subsequently decided they did not require payment. The team reported that most practices  
5 were initially concerned they did not have enough time to export the data: However, once explained  
6 that the project team would assist, they agreed to proceed. From a technology perspective, although  
7 most practices were familiar with using Medical Objects, most had never used the export file function  
8 available in their electronic record system and required training. The majority of practices had not  
9 heard of Kiteworks and were concerned about using it. However, once explained it was a standard  
10 method used for file transfer by Queensland Health, practices were reassured.

11

#### 12 **Theme 5. Corporate-owned general practices**

13 Nine practices were part of corporate entities (two) with 12 patients collectively. File transfer needed  
14 authorisation, and only one corporate entity eventually allowed practice participation.

15

#### 16 **Discussion**

17 This study reports that the majority of patients gave permission for their healthcare information to be  
18 used for research – including that from primary care - and to be recontacted to discuss participation in  
19 clinical trials. The ATHENA consent-to-recontact concept also demonstrated its effectiveness to  
20 recruit to new research studies, with over 90% of patients recontacted agreeing to have their contact  
21 details passed on, and over 50% consenting to take part in a new research study. The study also  
22 describes the methods by which primary healthcare data can be successfully extracted from general  
23 practices and then linked for COVID-19 related research, using informed consent. Our study also  
24 reported the majority of general practices were willing to export identifiable patient healthcare data for  
25 linkage, provided consent had been obtained. Electronic consent was accepted by general practices  
26 as evidence of consent from patients. Lack of time and financial remuneration were not found to be  
27 significant issues. However, due to the relatively low consent proportions and risk of bias,  
28 investigation of the predictors of adverse outcomes was considered to lack validity and not  
29 worthwhile.

1 Slow recruitment of suitable participants to clinical trials is a major barrier facing research which  
2 delays the delivery of outcomes and inflates costs.<sup>1</sup> Lower recruitment numbers also affect trial  
3 validity with little more than half of trials recruiting the originally specified sample size.<sup>30, 31</sup> Novel  
4 approaches to recruitment strategies have been recommended and the consent-to-recontact method  
5 has been shown to be successful in the UK NHS Research for the Future program. This took a  
6 passive opportunistic approach using multi-media advertising to recruit patients.<sup>2</sup> In contrast, our  
7 study took a systematic approach by actively contacting patients with COVID-19 and showed that the  
8 majority of patients approached were willing to be recontacted. Importantly, when applied to a real-  
9 world study, the recontact method successfully increased the number of patients recruited by 2.4-fold.  
10 Primary care in Australia has one of the most widespread uptake of electronic medical record systems  
11 in the world.<sup>23</sup> Despite this, utilisation of primary healthcare data for research and other secondary  
12 purposes is not occurring.<sup>32, 33</sup> Progress has been made with the introduction of the national 'My  
13 Health Record' and New South Wales 'Lumos' program. Lumos has linked the primary healthcare  
14 records of 1.3 million patients from 156 practices within New South Wales to other health system  
15 data.<sup>34, 35</sup> However, due to privacy issues related to either an opt-out process (My Health Record) and  
16 a waiver of consent (Lumos), access to these datasets are restricted and use for research and  
17 consent to recontact is not possible.

18 The proportions consenting in our study were similar to other Australian studies.<sup>36</sup> The relatively lower  
19 consent proportions (75%) suggest that a consent-based approach to gain permission to extract and  
20 link primary care data for population health research is not suitable due to the risk of bias. However,  
21 this approach is suitable for internal comparison research and mandatory for the creation of a cohort  
22 of patients who can be recontacted to participate in clinical trials. In this study, there are advantages  
23 and disadvantages to using either 'patients reached a decision about consent' (n=842), or where 'first  
24 contact was successful' (n=995), as a denominator, and therefore both values are quoted. Using the  
25 former as the denominator provides a focused analysis specifically on the subset of patients who  
26 actively participated in the consent decision process, and highlights consent rates among engaged  
27 participants. However, this method may also underestimate the overall participation rate whereby a  
28 significant number of patients who were successfully contacted did not reach a consent decision for  
29 various reasons (e.g., lack of interest, misunderstanding of study details). The advantage of the latter

1 approach is that it offers a broader perspective on patient engagement regardless of the final consent  
2 decision.

3 In our study, patient consent was required as identifiable patient data was being extracted.<sup>37</sup> A  
4 systematic review of 25 studies from multiple countries (including Australia) on the public responses  
5 to the sharing and linkage of health data for research purposes reported that there was widespread  
6 public support for research.<sup>38</sup> However, support was conditional and depended on the interplay of  
7 multiple factors. Patients wanted control of their data (through consent) and the ability to express  
8 preferences as to who accessed their data. They also required a high level of trust in the institution  
9 looking after their data and knowledge of how it was to be used. Patients were sensitive to the fact  
10 that the need for consent had to be balanced against the inefficiencies of having to gain consent, and  
11 that lower consent proportions might lead to bias. The report noted that if participants understood the  
12 reasons for requiring the data, then opinions shifted away from opt-in consent to either opt-out or  
13 varied consent.

14 Since general practices are integral to the sharing and linkage of primary healthcare data, an  
15 understanding of their perspectives is vital. General practitioner attitudes to data sharing for research  
16 in Europe and the USA are well described.<sup>17-20, 39</sup> However, little is known in the Australian context  
17 whereby previous studies have interviewed small numbers of general practitioners on their  
18 perspectives of the sharing of data for research.<sup>14, 15</sup> Our study differs in that we collated the  
19 impressions from over 300 general practices asked to participate in a research study requiring  
20 healthcare data export. General practices are custodians of their patients' health information and  
21 highly protective of patients' privacy.<sup>40</sup> This was evident in our study, where all practices wanted a  
22 copy of the signed consent, with a proportion phoning the patient to confirm. Interestingly, no general  
23 practice asked whether the data would be sold on or whether the pharmaceutical industry would have  
24 access which were concerns found in other studies.<sup>14, 15</sup> In addition, some practices challenged the  
25 need to export the whole patient file indicating an awareness that only data relevant to the research  
26 study should be collected. Concerns around data security is a recurring theme in the literature mainly  
27 regarding patient re-identification and data breaches, but this was not an issue for the majority of  
28 general practices in our study.<sup>14, 15</sup> Trust in the institutions conducting the research is also an  
29 important issue raised by general practitioners.<sup>14, 15</sup> In our study, the impression was that practices felt  
30 reassured that Queensland Health and a reputable university were undertaking the study. Financial

1 reimbursement to general practices for the time and effort taken to share health information is a  
2 common theme raised in the literature. In one study, all general practitioners believed remuneration to  
3 be a key issue and in another, two out of 11 felt a monetary incentive should be provided.<sup>14, 15</sup> In our  
4 study only one practice (<1%) decided not to participate due to lack of payment. At the start of the  
5 study, we were concerned how practices would respond to the use of electronic consent. We found  
6 the majority accepted this method. This was likely due to the change in health practices induced by  
7 the pandemic. Social distancing and a greater reliance on electronic means of recording transactions  
8 such as electronic prescribing, meant that practices were already well on the path to accepting e-  
9 consent and digital signatures.<sup>41</sup>

10 Based on our findings, our recommendations would be to consider electronic rather than paper-based  
11 consent, active engagement with patients and taking a systematic (rather than opportunistic)  
12 approach when mass-recruiting for potential research and recontact. It is also important to ensure  
13 clear and transparent communication with patients about their data use and future recontact, and the  
14 importance of patient consent and active engagement with general practices if primary care data is to  
15 be used.

16

### 17 **Study limitations**

18 A main limitation is that questionnaires were not used to directly assess general practice staff  
19 attitudes to sharing primary care data. Rather, we recorded interactions with staff over the course of  
20 the study and reported on them. Although all interactions included written documentation of  
21 comments made by general practice staff, subjective impressions were made by the liaison team and  
22 at risk of interpretation bias. Previous studies focused on the general practitioner's attitude alone and  
23 did not encompass the opinions of all staff working in the practice. This should be considered when  
24 comparisons are made. Our study was conducted during the unique situation of a pandemic, and it  
25 may be suggested that once normal conditions resume, the results of this study will no longer apply.  
26 However, whilst the pandemic has caused a major shift in work patterns, the IT methods used in this  
27 study were already in standard use, and any new adaptations such as e-consent, are likely to remain  
28 permanent. Finally, 30% of patients and their associated practices did not participate in the study,  
29 which may be a source of selection bias. Despite these limitations, this study was able to elicit useful  
30 information from Australian general practices regarding their impressions on the export of health data

1 for research. The extraction of general practice patient data was a time-consuming process and not  
2 suitable to be undertaken at scale. At the start of the pandemic this process was felt to be the most  
3 straightforward to set up, and whilst it has provided valuable information on processes and attitudes of  
4 general practices involved, a faster automated version of primary care data extraction is in  
5 development.

6

## 7 **Conclusions**

8 This study showed that the majority of patients and their general practices consented to share their  
9 health information for research and recontact. The consent-to-recontact method proved successful in  
10 recruiting to a separate research study. The study also described the methods by which primary  
11 healthcare data was successfully extracted from general practices and linked to other health data for  
12 the purposes of research using informed consent. This knowledge will inform implementation of the  
13 larger ATHENA study, as well as those intending to link primary healthcare data for research and use  
14 for recruitment to clinical trials and other studies in future.

15

1 **Table 1. Categories of patient consent responses to request health data extraction from**  
2 **general practice and use for research, and recontact to discuss participation in future clinical**  
3 **trials.**

|                      | Consent to data extraction for research |          |          |          |
|----------------------|-----------------------------------------|----------|----------|----------|
|                      |                                         | Agreed   | Declined | Total    |
| Consent to recontact | Agreed                                  | 567(67%) | 48(6%)   | 615(73%) |
|                      | Declined                                | 14(2%)   | 213(25%) | 227(27%) |
|                      | Total                                   | 581(69%) | 261(31%) | 842      |

4

5



1 **Table 2. Characteristics of participating general practices and their patients with an**  
 2 **electronic medical record-compatible export file.**  
 3

| Characteristics                                 | n (%)      | 4  |
|-------------------------------------------------|------------|----|
| <b>Total no. of practices who exported data</b> | 331 (100%) | 5  |
| <b>No. of patients per practice</b>             |            | 6  |
| 1 patient                                       | 218 (66%)  | 7  |
| 2-3 patients                                    | 96 (29%)   | 8  |
| 4-5 patients                                    | 14 (4%)    | 9  |
| >5 patients                                     | 3 (<1%)    | 10 |
| <b>Modified Monash (MM) Model Region</b>        |            | 11 |
| MM 1                                            | 264 (80%)  | 12 |
| MM 2                                            | 50 (15%)   | 13 |
| MM 3                                            | 3 (<1%)    | 14 |
| MM 4                                            | 4 (1%)     | 15 |
| MM 5                                            | 10 (3%)    | 16 |
| MM 6                                            | 0          | 17 |
| MM 7                                            | 0          | 18 |
| <b>State in which practice located</b>          |            | 19 |
| Queensland                                      | 319 (96%)  | 20 |
| New South Wales                                 | 7 (2%)     | 21 |
| Victoria                                        | 4 (1%)     | 22 |
| Australian Capital Territory                    | 1 (<1%)    | 23 |
| Other states/territory                          | 0          | 24 |
|                                                 |            | 25 |
|                                                 |            | 26 |
|                                                 |            | 27 |
|                                                 |            | 28 |
|                                                 |            | 29 |
|                                                 |            | 30 |
|                                                 |            | 31 |
|                                                 |            | 32 |
|                                                 |            | 33 |
|                                                 |            | 34 |
|                                                 |            | 35 |
|                                                 |            | 36 |

37 *\*Modified Monash Model defines whether a location is in a city, rural, remote or very remote area,*  
 38 *whereby MM 1 is a major city and MM 7 is very remote.*  
 39

1 **Table 3. General practice attitudes to the export of primary healthcare data to**  
 2 **Queensland Health for COVID-19 research.**

| ISSUES                                                                                                       | BARRIERS                                                                                                                                                                                                                                                                                                                                                                                                                                                                                                                                                      | ENABLERS                                                                                                                                                                                                                                                                                         |
|--------------------------------------------------------------------------------------------------------------|---------------------------------------------------------------------------------------------------------------------------------------------------------------------------------------------------------------------------------------------------------------------------------------------------------------------------------------------------------------------------------------------------------------------------------------------------------------------------------------------------------------------------------------------------------------|--------------------------------------------------------------------------------------------------------------------------------------------------------------------------------------------------------------------------------------------------------------------------------------------------|
| <b>Theme 1: Support for study concept and sharing of health information for research</b>                     |                                                                                                                                                                                                                                                                                                                                                                                                                                                                                                                                                               |                                                                                                                                                                                                                                                                                                  |
| Support of practice for the research study concept                                                           | 12 practices felt the study was not worthwhile. Examples given included: <ul style="list-style-type: none"> <li>• “It isn’t clinical research.”</li> <li>• “Nothing therapeutic is being undertaken.”</li> <li>• “Not on our priority list” as pre-occupied with pandemic,</li> <li>• coping with vaccination roll out, or</li> <li>• lack of staff.</li> </ul>                                                                                                                                                                                               | Succinct, clear statements (scripts read by liaison team) of the project with supporting literature was provided to general practices and a link to the official Queensland Health ATHENA CV-19 Website.<br><br>Often general practices were keen to know the outcome of the study.              |
| COVID-19 opinions                                                                                            | One practice at start of study believed that the COVID-19 outbreak was not real, and therefore declined to participate even though patient consent was obtained.                                                                                                                                                                                                                                                                                                                                                                                              | The practice eventually participated after a letter was sent to them by ACV19 practice lead.                                                                                                                                                                                                     |
| Ongoing commitment to the study                                                                              | 10 practices thought they had to actively participate in the project themselves, were not insured and therefore did not want to participate.                                                                                                                                                                                                                                                                                                                                                                                                                  | Explained that they were only required to export patient data consented for participants that consented to the study. They all agreed to participate.                                                                                                                                            |
| Practice staffing structures                                                                                 | If administration staff were the first point of contact, they said they did not have the authority or had limited access to be able to help.                                                                                                                                                                                                                                                                                                                                                                                                                  | We asked to be directed to the practice manager                                                                                                                                                                                                                                                  |
| Request by practices that ethics approval been given for the study                                           | 4 practices asked whether the study had ethics approval.                                                                                                                                                                                                                                                                                                                                                                                                                                                                                                      | Informed the study was ethically approved and which Human Research Ethics Committee had given approval. Also informed that all future projects had to be COVID-related research and would require ethics approval.                                                                               |
| Request by practices as to where the data was going to be stored                                             | 6 practices asked where the data was going to be stored e.g., Queensland Health, within state, interstate, or overseas.                                                                                                                                                                                                                                                                                                                                                                                                                                       | Reassured it was within secure Queensland Health infrastructure.                                                                                                                                                                                                                                 |
| Request by practices as to who would have access to the data                                                 | 1 practice asked who was going to access and use data.<br>No one asked if data would be sold on, or pharma access.                                                                                                                                                                                                                                                                                                                                                                                                                                            | We advised that the Research School of Population Health at the Australian National University would analyse the de-identified, aggregate data. The practice was then comfortable that a well-known and reputable university was involved.                                                       |
| <b>Theme 2: Patient consent to allow healthcare data release;</b>                                            |                                                                                                                                                                                                                                                                                                                                                                                                                                                                                                                                                               |                                                                                                                                                                                                                                                                                                  |
| Concern by practices over loss of control of patients                                                        | 15 practices, when approached to request a patient record, were concerned that we had already approached the patient and gained consent without the practice knowing or being involved. Reasons given were: the practice owned the data and could not be forced to provide the data; the practice should have had the opportunity to advise the patient before we spoke to them; the practice was not being given a choice regarding data release: “since the patient has consented, we have no choice but to release the data”; the patient lacked capacity. | All of these were referred to our general practice liaison lead who addressed practices’ concerns. 13 agreed to export the patient file. 2 practices would not release the data.                                                                                                                 |
| Need to sight patient signed consent form practices                                                          | All practices wanted to see the signed consent form before exporting patient file.<br>8 practices wanted to sight the signed consent before confirming that a patient was a member of their practice.                                                                                                                                                                                                                                                                                                                                                         | The signed consent forms were provided to the practices. Signed consent forms were stored automatically in the patients file within the general practice management system. 18 practices had difficulty finding patient’s e-signature and required a telephone call from the team to guide them. |
| Practices comfortable with acceptance of e-consent and e-signature                                           | Concern practices would not use e-consent and e-signature.<br>18 practices phoned patient to confirm they had signed consent.                                                                                                                                                                                                                                                                                                                                                                                                                                 | The vast majority were comfortable with an electronic consent and e-signature.<br><br>Although a recording of verbal consent was available, no practices requested a copy of the recording.                                                                                                      |
| <b>Theme 3: Trust, legal issues, cybersecurity</b>                                                           |                                                                                                                                                                                                                                                                                                                                                                                                                                                                                                                                                               |                                                                                                                                                                                                                                                                                                  |
| Levels of trust of practices for Queensland Health to act as custodian of data and manage the research study | Practices were frequently unaware they had a patient with CV19. 32 practices were concerned that neither the patient nor Queensland Health had informed the practice that they had a patient with COVID. Practices were quite concerned that the patient may have come to the practice whilst infectious. “Why weren’t we informed?” “I am in the patient file but there is no record of CV19”.                                                                                                                                                               | Apologised, but beyond our control.                                                                                                                                                                                                                                                              |
| Practice opinion of those conducting the study                                                               | Most practices asked who was conducting and overseeing the study                                                                                                                                                                                                                                                                                                                                                                                                                                                                                              | Practices were trusting that Queensland Health was responsible for the study. They considered Queensland Health to be a trusted third party. This                                                                                                                                                |

|                                                                                                                         |                                                                                                                                                                                                                                                                                                                                    |                                                                                                                                                                                                                                                                                                                                                                                                                                                                                                                                                                                                                                                                                               |
|-------------------------------------------------------------------------------------------------------------------------|------------------------------------------------------------------------------------------------------------------------------------------------------------------------------------------------------------------------------------------------------------------------------------------------------------------------------------|-----------------------------------------------------------------------------------------------------------------------------------------------------------------------------------------------------------------------------------------------------------------------------------------------------------------------------------------------------------------------------------------------------------------------------------------------------------------------------------------------------------------------------------------------------------------------------------------------------------------------------------------------------------------------------------------------|
| Concerns by practice that the ATHENA COVID-19 Study was a hoax or scam                                                  | At the start most general practices had not heard of the ACV-19 Study; 19 practices questioned our authenticity when we called them.                                                                                                                                                                                               | played an important factor in patient file export. <ul style="list-style-type: none"> <li>Practices were directed to the ATHENA website with letters of support which was highly effective.</li> <li>They sometimes used the available call back number.</li> <li>The release of study information through PHN and RACGP newsletters and the general practice information packs helped raise the awareness of the study.</li> <li>The time between our first and second contact to practices allowed time to confirm the legitimacy of the study, peruse information packs and discuss participation with colleagues.</li> <li>As the study progressed, it became more well known.</li> </ul> |
| Practices need to independently verify that the study and release of data for research purposes, met legal requirements | 1 practice wanted legal counsel prior to agreeing to participate.                                                                                                                                                                                                                                                                  | We provided the information requested to the practice legal teams who were satisfied with our processes. The practice was sanctioned to export patient healthcare data to Queensland Health.                                                                                                                                                                                                                                                                                                                                                                                                                                                                                                  |
| Concern by practices about the request for the whole patient record rather than coded data alone                        | 23 practices were not comfortable with exporting the whole patient file which, in addition to containing the coded data, also included potentially sensitive information contained within non-coded documents (e.g., scanned letters, results and reports), and not necessary for the research study.                              | We reassured practices we would delete the entire patient files once the coded data had been extracted for the study.                                                                                                                                                                                                                                                                                                                                                                                                                                                                                                                                                                         |
|                                                                                                                         | 9 of these practices then contacted patient themselves and recommended against participating in the study. The patients then did not want to participate.                                                                                                                                                                          | When these patients were contacted as part of the protocol follow up call by our liaison team, six patients changed their mind and decided to participate, 1 practice still refused to send patient file.                                                                                                                                                                                                                                                                                                                                                                                                                                                                                     |
| <b>Theme 4: Reimbursement, time constraints and technology issues</b>                                                   |                                                                                                                                                                                                                                                                                                                                    |                                                                                                                                                                                                                                                                                                                                                                                                                                                                                                                                                                                                                                                                                               |
| Request for practices to receive monetary compensation for participation                                                | 9 practices initially requested payment ranging from \$80-\$150 to export the data                                                                                                                                                                                                                                                 | 7 of these eventually decided they did not require payment. 1 practice declined to participate unless they received monetary compensation.                                                                                                                                                                                                                                                                                                                                                                                                                                                                                                                                                    |
| Practices concerned they may not have the time to undertake data transfer.                                              | The majority of practices were initially concerned they did not have enough time to go through the process of exporting the data.                                                                                                                                                                                                  | Once explained it would take <5 minutes to undertake and they would be 'walked through' the process, they were confident to proceed.                                                                                                                                                                                                                                                                                                                                                                                                                                                                                                                                                          |
| Concerns of EMR/practices over security and logistics required to enact data transfer.                                  | Practice familiarity with Medical Objects                                                                                                                                                                                                                                                                                          | The vast majority of practices were familiar with using Medical Objects. 3 practices required faxing of the signed consent because it had to be sent interstate (no Medical Objects available). 5 practices were emailed the signed consent encrypted with password. The password was verbally given to the practice manager to allow extraction of the zip file.                                                                                                                                                                                                                                                                                                                             |
|                                                                                                                         | The majority of practices had never used the export function available on their practice management system (EMR).                                                                                                                                                                                                                  | 'How to' instructions for EMR included in the information pack that was sent to each practice, as well as the verbal 'walk through' by the general practice liaison team helped. Some practices were pleased they were being trained how to use the export file function.                                                                                                                                                                                                                                                                                                                                                                                                                     |
|                                                                                                                         | The majority of practices had not heard of, or used 'Kiteworks' before and a small proportion were concerned about its use to send patient files                                                                                                                                                                                   | Once explained that this was a standard method used for secure file transfer by Queensland Health, all were reassured and those that participated had little difficulty using.                                                                                                                                                                                                                                                                                                                                                                                                                                                                                                                |
| <b>Theme 5: Corporate owned general practices</b>                                                                       |                                                                                                                                                                                                                                                                                                                                    |                                                                                                                                                                                                                                                                                                                                                                                                                                                                                                                                                                                                                                                                                               |
| Influence of general practice size                                                                                      | 9 general practices were part of two corporate entities, and between them collectively had 12 COVID patients. The transfer of files needed to be authorised centrally by the corporate office. Both corporate entities cited a difficulty in participating, partly because of restrictive corporate policies limiting permissions. | For both of the corporate entities, the corporate entity itself was approached explaining the consent model and requesting participation. One corporate entity agreed to participate on the condition that patients (n=9) signed an additional consent from explicitly directing the corporate to transfer their records to Queensland Health. The other entity declined to participate because of restrictive corporate policies limiting permissions. The corporate entity that did participate had a compatible EMR however, they were using an older unsupported version and transferred files were unreadable.                                                                           |

- 1 EMR = electronic medical record; ACV19: ATHENA COVID-19; ATHENA: Australians Together
- 2 Health Initiative; COVID-19: Coronavirus disease 2019; GP: General practice

1 **Figure 1. Flow chart of patient and general practice recruitment**

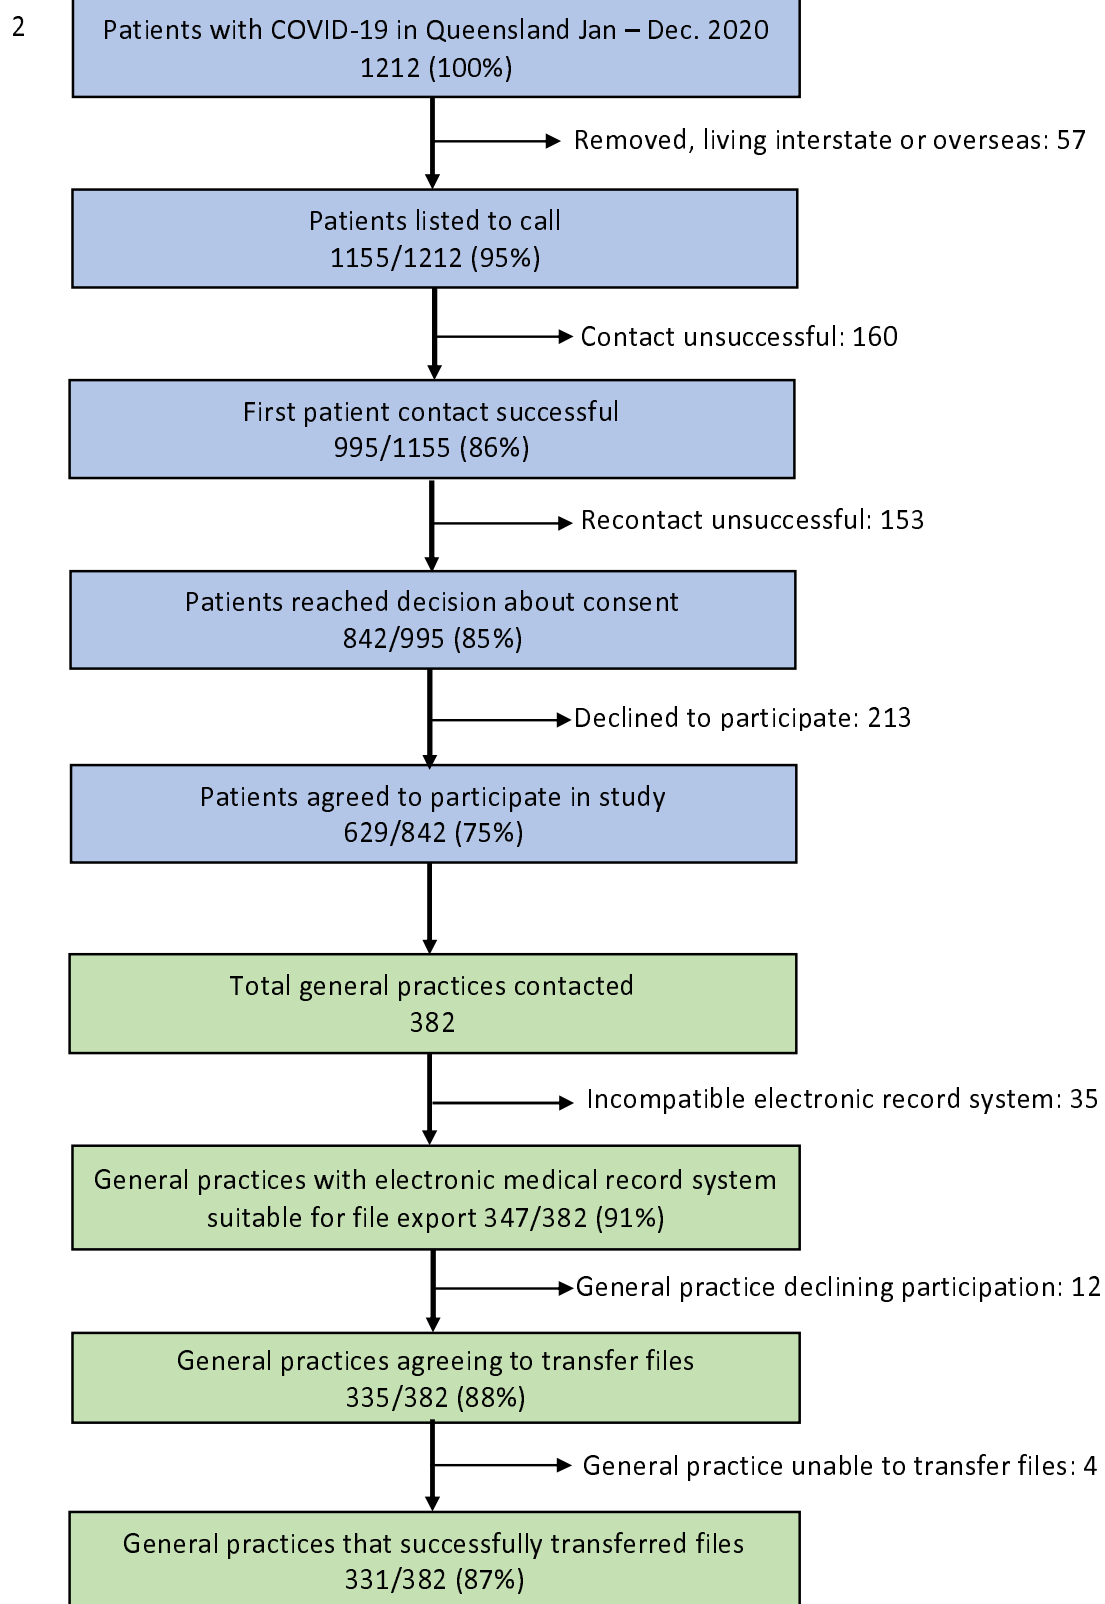

1    **Declarations**

2

3    **Ethics approval and consent to participate.**

4    The ATHENA COVID-19 Study was granted Ethics approval from the Gold Coast Human  
5    Research Ethics Committee, Queensland, Australia on the 24th April 2020 and all  
6    participants provided written informed consent before participating in the study. The study  
7    was conducted in accordance with the 1964 Helsinki declaration and its later amendments.

8    Approval #:    HREC/2020/QGC/63555

9

10   **Consent for publication**

11   Not applicable

12

13   **Availability of data and materials**

14   Datasets used and analysed during this study are available from the corresponding author  
15   upon reasonable request.

16

17

18   **Competing interests**

19   None

20

21   **Funding**

22   Funding was provided by the Health Innovation Investment and Research Office,  
23   Queensland Health.

24

1 **Authors' contributions**

2 The authors confirm contribution to the paper as follows: study conception and design: KG,  
3 AK, ZB, JW, MM, XT, TJ, CB, TS, and RK; data collection: KG, AK, ZB, XT; analysis and  
4 interpretation of results: KG, AK, ZB, JW, MM, XT, TJ, TS, and RK; draft manuscript  
5 preparation: KG, AK, ZB, JW, MM, XT, TJ, CB, TS, and RK; manuscript copy-editing: KG, AK,  
6 ZB, JW, MM, XT, TJ, CB, TS, and RK. All authors reviewed the results and approved the final  
7 version of the manuscript.

8

9 **Acknowledgements**

10 We would like to thank the team at the Health Innovation Investment and Research Office  
11 for their invaluable support. Also, the support of the ATHENA Coordination Centre, general  
12 practice liaison team of, Nikitas Kamarinos, Lisa Edward, Clinton Bazely and Kimberley  
13 Getley, also, Dr Jonathan Harper and Pattie Hudson at the Central Queensland, Wide Bay  
14 and Sunshine Coast PHN and Consumer advocate Anna Voloschenko.

15

16 **Authors' information (optional)**

17 None

18

1  
2 **References**  
3

- 4 1. Al-Shahi Salman R, Beller E, Kagan J, et al. Increasing value and reducing waste in  
5 biomedical research regulation and management. *Lancet* 2014; 383: 176-185. 2014/01/15.  
6 DOI: 10.1016/S0140-6736(13)62297-7.
- 7 2. Grady K, Gibson M and Bower P. Can a 'consent to contact' community help research  
8 teams overcome barriers to recruitment? The development and impact of the 'Research for  
9 the Future' community. *BMC Med Res Methodol* 2019; 19: 195. 2019/10/24. DOI:  
10 10.1186/s12874-019-0843-4.
- 11 3. Grant A, Ure J, Nicolson DJ, et al. Acceptability and perceived barriers and facilitators  
12 to creating a national research register to enable 'direct to patient' enrolment into research:  
13 the Scottish Health Research Register (SHARE). *BMC Health Serv Res* 2013; 13: 422.  
14 20131018. DOI: 10.1186/1472-6963-13-422.
- 15 4. World Health Organisation. Stronger Collaboration, Better Health. Global Action Plan  
16 for Healthy Lives and Well-being for All, [https://www.who.int/initiatives/sdg3-global-action-](https://www.who.int/initiatives/sdg3-global-action-plan)  
17 [plan](https://www.who.int/initiatives/sdg3-global-action-plan) (2019, accessed 20 Oct 2021 2021).
- 18 5. Britt H, Miller G, Henderson J, et al. General practice activity in Australia 2015–16,  
19 <https://ses.library.usyd.edu.au/handle/2123/15514> (2016, accessed 20 Oct 2021 2021).
- 20 6. Brown A, Kirichek O, Balkwill A, et al. Comparison of dementia recorded in routinely  
21 collected hospital admission data in England with dementia recorded in primary care. *Emerg*  
22 *Themes Epidemiol* 2016; 13: 11. 2016/11/02. DOI: 10.1186/s12982-016-0053-z.
- 23 7. Einarsdottir K, Preen DB, Emery JD and Holman CD. Regular primary care decreases  
24 the likelihood of mortality in older people with epilepsy. *Med Care* 2010; 48: 472-476.  
25 2010/04/16. DOI: 10.1097/MLR.0b013e3181d68994.
- 26 8. Einarsdottir K, Preen DB, Sanfilippo FM, et al. Mortality in Western Australian seniors  
27 with chronic respiratory diseases: a cohort study. *BMC Public Health* 2010; 10: 385.  
28 2010/07/02. DOI: 10.1186/1471-2458-10-385.
- 29 9. Herrett E, Shah AD, Boggon R, et al. Completeness and diagnostic validity of  
30 recording acute myocardial infarction events in primary care, hospital care, disease registry,  
31 and national mortality records: cohort study. *BMJ* 2013; 346: f2350. 2013/05/23. DOI:  
32 10.1136/bmj.f2350.
- 33 10. Productivity Commission Canberra. Data Availability and Use: Overview &  
34 Recommendations, [https://www.pc.gov.au/inquiries/completed/data-access/report/data-](https://www.pc.gov.au/inquiries/completed/data-access/report/data-access-overview.pdf)  
35 [access-overview.pdf](https://www.pc.gov.au/inquiries/completed/data-access/report/data-access-overview.pdf) (2017, accessed 20 Oct 2021 2021).
- 36 11. Boyle DI. Middleware Supporting Next Generation Data Analytics in Australia. *Stud*  
37 *Health Technol Inform* 2015; 216: 1019. 2015/08/12.
- 38 12. Palamuthusingam D, Johnson DW, Hawley C, et al. Health data linkage research in  
39 Australia remains challenging. *Intern Med J* 2019; 49: 539-544. 2019/04/09. DOI:  
40 10.1111/imj.14244.
- 41 13. The Royal Australian College of General Practitioners. RACGP Practice Technology  
42 and Management: Minimum requirements for general practice clinical information systems  
43 to improve usability,  
44 [https://www.racgp.org.au/FSDEDEV/media/documents/Running%20a%20practice/Support](https://www.racgp.org.au/FSDEDEV/media/documents/Running%20a%20practice/Support%20and%20tools/Minimum-requirements-for-general-practice-CIS.pdf)  
45 [%20and%20tools/Minimum-requirements-for-general-practice-CIS.pdf](https://www.racgp.org.au/FSDEDEV/media/documents/Running%20a%20practice/Support%20and%20tools/Minimum-requirements-for-general-practice-CIS.pdf) (2018, accessed 20  
46 Oct 2021 2021).



- 1 14. Hodgkins AJ, Mullan J, Mayne DJ, et al. Australian general practitioners' attitudes to  
2 the extraction of research data from electronic health records. *Aust J Gen Pract* 2020; 49:  
3 145-150. 2020/03/03. DOI: 10.31128/AJGP-07-19-5024.
- 4 15. Monaghan T, Manski-Nankervis JA and Canaway R. Big data or big risk: general  
5 practitioner, practice nurse and practice manager attitudes to providing de-identified  
6 patient health data from electronic medical records to researchers. *Aust J Prim Health* 2020;  
7 26: 466-471. 2020/12/10. DOI: 10.1071/PY20153.
- 8 16. Royal Australian College of General Practitioners. Guiding principles for managing  
9 requests for the secondary use of de-identified general practice data,  
10 [https://www.racgp.org.au/running-a-practice/security/managing-practice-](https://www.racgp.org.au/running-a-practice/security/managing-practice-information/secondary-use-of-general-practice-data/de-identified-general-practice-data)  
11 [information/secondary-use-of-general-practice-data/de-identified-general-practice-data](https://www.racgp.org.au/running-a-practice/security/managing-practice-information/secondary-use-of-general-practice-data/de-identified-general-practice-data)  
12 (2019, accessed 21 Sept 2022).
- 13 17. Gentil ML, Cuggia M, Fiquet L, et al. Factors influencing the development of primary  
14 care data collection projects from electronic health records: a systematic review of the  
15 literature. *BMC Med Inform Decis Mak* 2017; 17: 139. 2017/09/28. DOI: 10.1186/s12911-  
16 017-0538-x.
- 17 18. Hummers-Pradier E, Scheidt-Nave C, Martin H, et al. Simply no time? Barriers to GPs'  
18 participation in primary health care research. *Fam Pract* 2008; 25: 105-112. 2008/04/18.  
19 DOI: 10.1093/fampra/cmn015.
- 20 19. Spencer K, Sanders C, Whitley EA, et al. Patient Perspectives on Sharing Anonymized  
21 Personal Health Data Using a Digital System for Dynamic Consent and Research Feedback: A  
22 Qualitative Study. *J Med Internet Res* 2016; 18: e66. 2016/04/17. DOI: 10.2196/jmir.5011.
- 23 20. Stevenson F. The use of electronic patient records for medical research: conflicts and  
24 contradictions. *BMC Health Serv Res* 2015; 15. DOI: [https://doi.org/10.1186/s12913-015-](https://doi.org/10.1186/s12913-015-0783-6)  
25 [0783-6](https://doi.org/10.1186/s12913-015-0783-6).
- 26 21. Stevenson F, Lloyd N, Harrington L and Wallace P. Use of electronic patient records  
27 for research: views of patients and staff in general practice. *Fam Pract* 2013; 30: 227-232.  
28 2012/11/08. DOI: 10.1093/fampra/cms069.
- 29 22. Welsh J, Korda RJ, Paige E, et al. The ATHENA COVID-19 Study: Cohort profile and  
30 first findings for people diagnosed with COVID-19 in Queensland, 1 January to 31 December  
31 2020. *Commun Dis Intell (2018)* 2021; 45 2021/10/01. DOI: 10.33321/cdi.2021.45.51.
- 32 23. Oderkirk J. Readiness of electronic health record systems to contribute to national  
33 health information and research, [https://www.oecd-ilibrary.org/social-issues-migration-](https://www.oecd-ilibrary.org/social-issues-migration-health/readiness-of-electronic-health-record-systems-to-contribute-to-national-health-information-and-research_9e296bf3-en)  
34 [health/readiness-of-electronic-health-record-systems-to-contribute-to-national-health-](https://www.oecd-ilibrary.org/social-issues-migration-health/readiness-of-electronic-health-record-systems-to-contribute-to-national-health-information-and-research_9e296bf3-en)  
35 [information-and-research\\_9e296bf3-en](https://www.oecd-ilibrary.org/social-issues-migration-health/readiness-of-electronic-health-record-systems-to-contribute-to-national-health-information-and-research_9e296bf3-en) (2017, accessed 20 Oct 2021 2021).
- 36 24. Macdonald K. Silly sausages being touted for Medical Director,  
37 [https://www.pulseitmagazine.com.au/blog/6107-silly-sausages-being-touted-for-](https://www.pulseitmagazine.com.au/blog/6107-silly-sausages-being-touted-for-medicaldirector)  
38 [medicaldirector](https://www.pulseitmagazine.com.au/blog/6107-silly-sausages-being-touted-for-medicaldirector) (2021, accessed October 20 2021 2021).
- 39 25. Health Innovation Investment and Research Office and Queensland Health. ATHENA  
40 COVID-19 Study, [https://www.health.qld.gov.au/research-reports/research-](https://www.health.qld.gov.au/research-reports/research-projects/athena-covid-19)  
41 [projects/athena-covid-19](https://www.health.qld.gov.au/research-reports/research-projects/athena-covid-19) (2020, accessed October 20 2021 2021).
- 42 26. Queensland Government Department of Health. Queensland Data Linkage  
43 Framework. In: Statistical Analysis and Linkage Unit SSB, Department of Health, (ed.).  
44 Brisbane: State of Queensland (Queensland Health), 2021.
- 45 27. Department of Health Australian Government. Modified Monash Model. The  
46 Modified Monash Model (MMM) defines whether a location is a city, rural, remote or very  
47 remote. Read about the MMM and how to search for areas classified under its structure,

- 1 [https://www.health.gov.au/health-topics/health-workforce/health-workforce-](https://www.health.gov.au/health-topics/health-workforce/health-workforce-classifications/modified-monash-model)
- 2 [classifications/modified-monash-model](https://www.health.gov.au/health-topics/health-workforce/health-workforce-classifications/modified-monash-model) (2021, accessed 20 Oct 2021 2021).
- 3 28. Lester J, Cho Y and Lochmiller C. Learning to do qualitative data analysis: a starting
- 4 point. *Human Resource Development Review* 2020; 19: 94-106.
- 5 29. Sinclair JE, Vedelago C, Ryan FJ, et al. Cardiovascular symptoms of PASC are
- 6 associated with trace-level cytokines that affect the function of human pluripotent stem cell
- 7 derived cardiomyocytes. *bioRxiv* 2024: 2024.2004.2011.587623. DOI:
- 8 10.1101/2024.04.11.587623.
- 9 30. Campbell MK, Snowdon C, Francis D, et al. Recruitment to randomised trials:
- 10 strategies for trial enrollment and participation study. The STEPS study. *Health Technol*
- 11 *Assess* 2007; 11: iii, ix-105. 2007/11/15. DOI: 10.3310/hta11480.
- 12 31. Sully BG, Julious SA and Nicholl J. A reinvestigation of recruitment to randomised,
- 13 controlled, multicenter trials: a review of trials funded by two UK funding agencies. *Trials*
- 14 2013; 14: 166. 2013/06/14. DOI: 10.1186/1745-6215-14-166.
- 15 32. Sturgiss E and van Boven K. Datasets collected in general practice: an international
- 16 comparison using the example of obesity. *Aust Health Rev* 2018; 42: 563-567. 2018/06/05.
- 17 DOI: 10.1071/AH17157.
- 18 33. Tran B, Straka P, Falster MO, et al. Overcoming the data drought: exploring general
- 19 practice in Australia by network analysis of big data. *Med J Aust* 2018; 209: 68-73.
- 20 2018/07/07. DOI: 10.5694/mja17.01236.
- 21 34. Australian Digital Health Agency. Benefits of My Health Record for healthcare
- 22 professionals, [https://www.myhealthrecord.gov.au/for-healthcare-professionals/what-is-](https://www.myhealthrecord.gov.au/for-healthcare-professionals/what-is-my-health-record/benefits-my-health-record-for-healthcare)
- 23 [my-health-record/benefits-my-health-record-for-healthcare](https://www.myhealthrecord.gov.au/for-healthcare-professionals/what-is-my-health-record/benefits-my-health-record-for-healthcare) (2021, accessed 20 Oct 2021
- 24 2021).
- 25 35. Correll P, Feyer A, Phan P, et al. Lumos: a statewide linkage programme in Australia
- 26 integrating general practice data to guide system redesign. *Integrated Healthcare Journal*
- 27 2021; 3: e000074. DOI: 10.1136/ihj-2021-000074.
- 28 36. Graves A, McLaughlin D, Leung J and Powers J. Consent to data linkage in a large
- 29 online epidemiological survey of 18-23 year old Australian women in 2012-13. *BMC Med Res*
- 30 *Methodol* 2019; 19: 235. 2019/12/13. DOI: 10.1186/s12874-019-0880-z.
- 31 37. Australian Government and Office of the Information Commissioner. Privacy Act
- 32 1988. *Federal Register of Legislation* 1988.
- 33 38. Aitken M, de St Jorre J, Pagliari C, et al. Public responses to the sharing and linkage of
- 34 health data for research purposes: a systematic review and thematic synthesis of qualitative
- 35 studies. *BMC Med Ethics* 2016; 17: 73. 2016/11/12. DOI: 10.1186/s12910-016-0153-x.
- 36 39. Wyatt D, Cook J and McKeivitt C. Perceptions of the uses of routine general practice
- 37 data beyond individual care in England: a qualitative study. *BMJ Open* 2018; 8: e019378.
- 38 2018/01/11. DOI: 10.1136/bmjopen-2017-019378.
- 39 40. The Royal Australian College of General Practitioners. Secondary use of general
- 40 practice data, [https://www.racgp.org.au/download/Documents/e-health/Secondary-use-of-](https://www.racgp.org.au/download/Documents/e-health/Secondary-use-of-general-practice-data.pdf)
- 41 [general-practice-data.pdf](https://www.racgp.org.au/download/Documents/e-health/Secondary-use-of-general-practice-data.pdf) (2017, accessed 20 Oct 2021 2021).
- 42 41. Department of Health Australian Government. Providing health care remotely during
- 43 COVID-19, [https://www.health.gov.au/news/health-alerts/novel-coronavirus-2019-ncov-](https://www.health.gov.au/news/health-alerts/novel-coronavirus-2019-ncov-health-alert/coronavirus-covid-19-advice-for-the-health-and-disability-sector/providing-health-care-remotely-during-covid-19)
- 44 [health-alert/coronavirus-covid-19-advice-for-the-health-and-disability-sector/providing-](https://www.health.gov.au/news/health-alerts/novel-coronavirus-2019-ncov-health-alert/coronavirus-covid-19-advice-for-the-health-and-disability-sector/providing-health-care-remotely-during-covid-19)
- 45 [health-care-remotely-during-covid-19](https://www.health.gov.au/news/health-alerts/novel-coronavirus-2019-ncov-health-alert/coronavirus-covid-19-advice-for-the-health-and-disability-sector/providing-health-care-remotely-during-covid-19) (2021, accessed 20 Oct 2021 2021).
- 46
